# Supplementary material
Source: publisher figshare collection journal article supplement (https://acs.figshare.com/ndownloader/files/4073920)
Supplement: Supplementary file 1 [file 4073920]

## Supplemental Figures

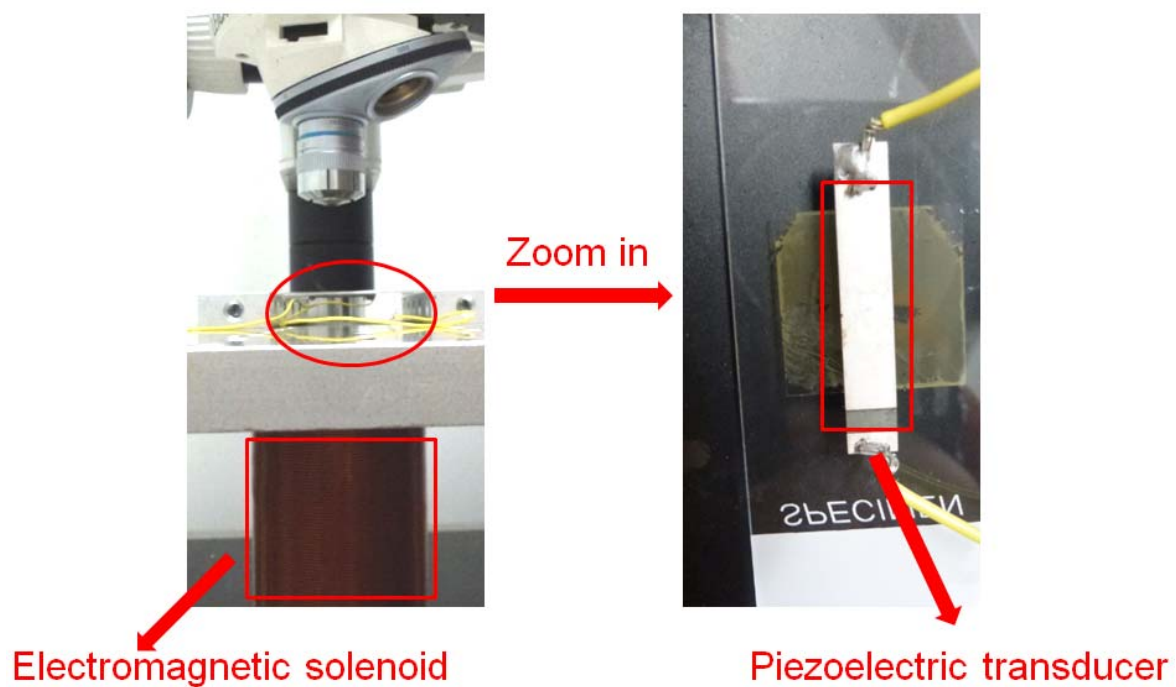

**Figure S1.** A photograph of our experimental setup: the sample was observed under an upright microscope, with the solenoid underneath the sample. For the experiments with acoustic concentration, a piezoelectric transducer is attached to the back of the slide to generate acoustic field.

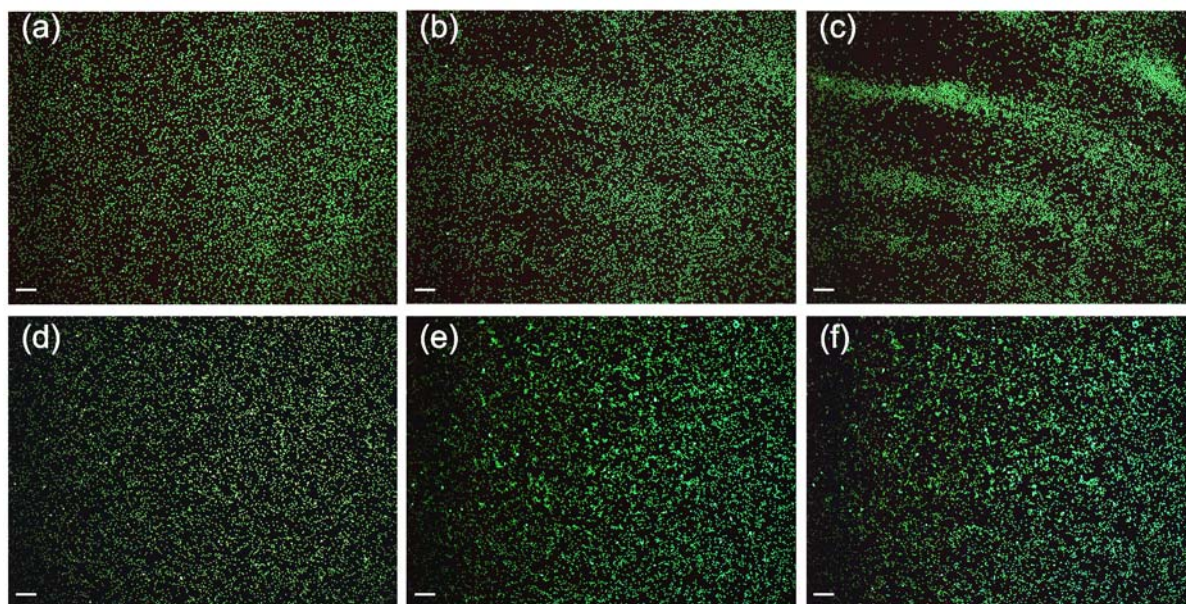

**Figure S2.** Illustration of acoustic concentration effects. A 1V, 2.93 MHz sine wave was used to drive PZT to generate acoustic field and concentrate the particles in local regions for: (a) 1 hour; (b) 2 hours; (c) 3 hours. Control experiments without acoustic field were conducted for: (a) 1 hour; (b) 2 hours; (c) 3 hours. The particles begin to locally concentrate in certain regions after applying the acoustic field for 2 hours. All the scale bars are 50 $\mu$ m.

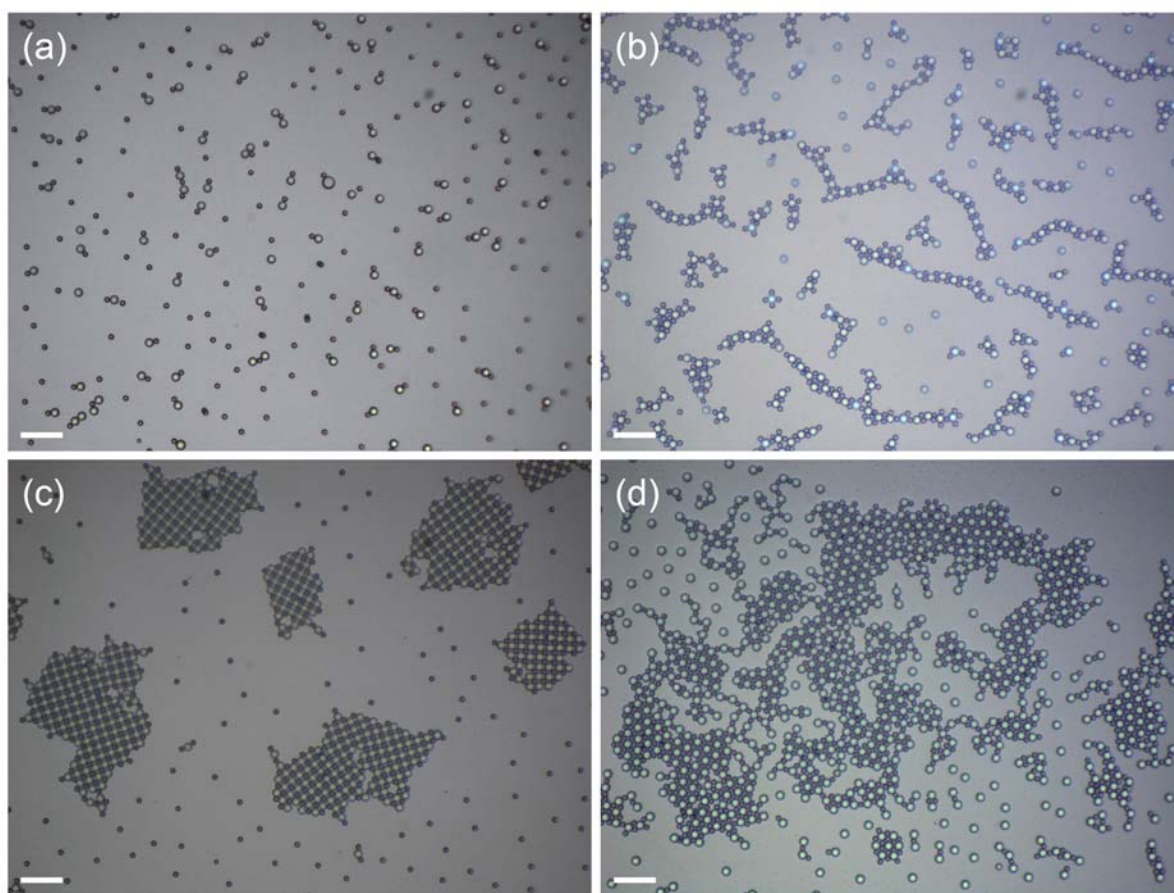

**Figure S3.** Wide field images of examples for different structures are illustrated: (a)  $MN$  ring at  $\phi=0.1\%$ ; (b)  $M_2N$  chains at  $\phi=0.8\%$ ; (c) square lattice at  $\phi=0.5\%$ ; (d) honeycomb lattice at  $\phi=0.8\%$ . Although there are sometimes multiple different types of structures present within each image, we chose to plot the dominant phase in the phase diagram. The scale bars are  $25\mu\text{m}$ .



(a)

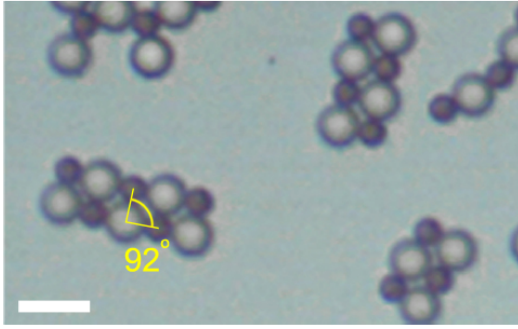

$$\phi = 0.4\%$$

(b)

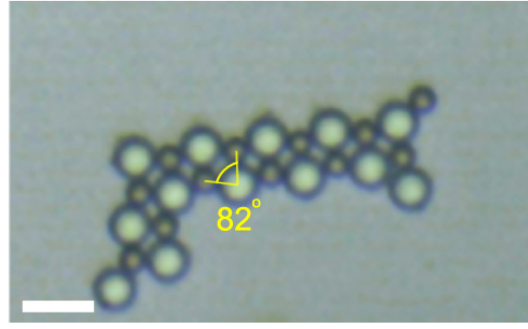

$$\phi = 0.7\%$$

(c)

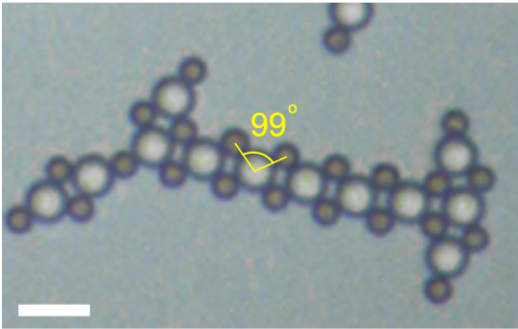

$$\phi = 0.5\%$$

(d)

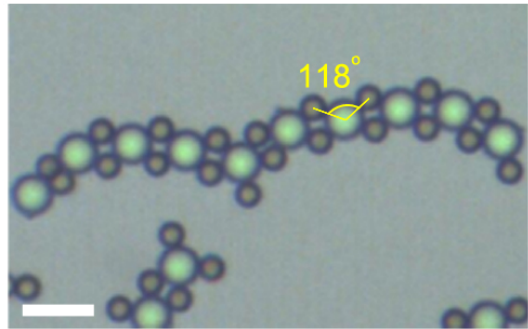

$$\phi = 0.8\%$$

**Figure S4.** In the 2-particle system, the particle sized difference introduces variations for the 1D chain structures in their way of packing. At slightly different ferrofluid concentrations, two different  $M_2N_2$  chain structures (a)(b), and two different  $M_2N$  structures (c)(d) can be observed. And the difference between (a) and (b), (c) and (d) can be observed through measurement angle measurement. The scale bars are  $10\mu\text{m}$ .

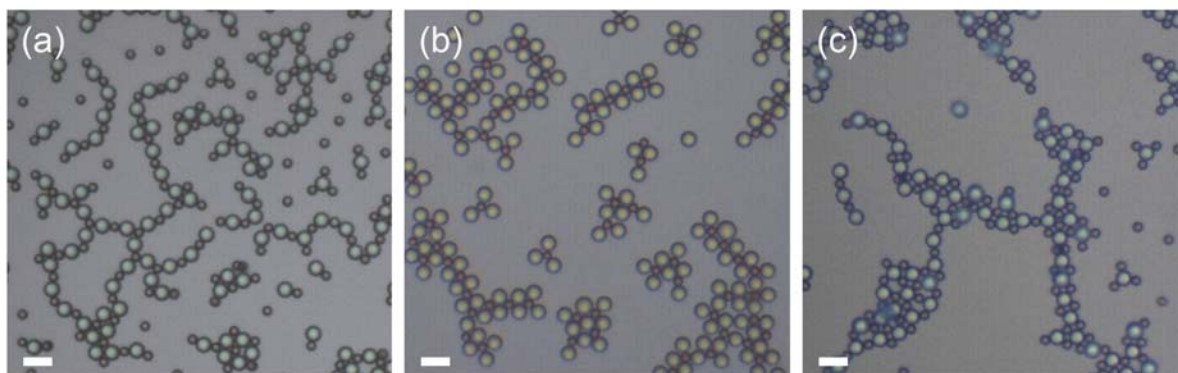

**Figure S5.** For certain ferrofluid concentrations at the border between two different equilibrium phases, a percolating network of chains was sometimes observed, such as those shown in (a) a network of  $MN$  chains at  $\varphi=0.2\%$ ; (b) a network of  $MN_2$  chains at  $\varphi=0.3\%$ ; (c) a network of  $MN_2$  chains at  $\varphi=0.5\%$ . The scale bars are  $10\mu\text{m}$ .
